# Supplementary material for: Facile fabrication of a flexible and shape-adaptive Cd0.5Zn0.5S-based photocatalytic system and its photocatalytic activity for hydrogen evolution from water
Source: Royal Society of Chemistry journal article supplement (doi:10.1039/d3se00782k), 2023-01-01
Supplement: d3se00782k1.pdf [file d3se00782k1.pdf]

## Supplementary Data

### **Facile fabrication of a flexible and shape-adaptive Cd<sub>0.5</sub>Zn<sub>0.5</sub>S-based photocatalytic system and its photocatalytic activity for hydrogen evolution from water**

Hui Liu, Luyao Xin, Lixia Qin, Taiyang Zhang, Xiangqing Li, Shi-Zhao Kang\*

*School of Chemical and Environmental Engineering, Shanghai Institute of  
Technology, 100 Haiquan Road, Shanghai 201418, China*

\* Corresponding author: Shi-Zhao Kang, Tel./fax: +86 21 60873061.

*E-mail address:* kangsz@sit.edu.cn (S.-Z. Kang)

Supplementary Fig. S1

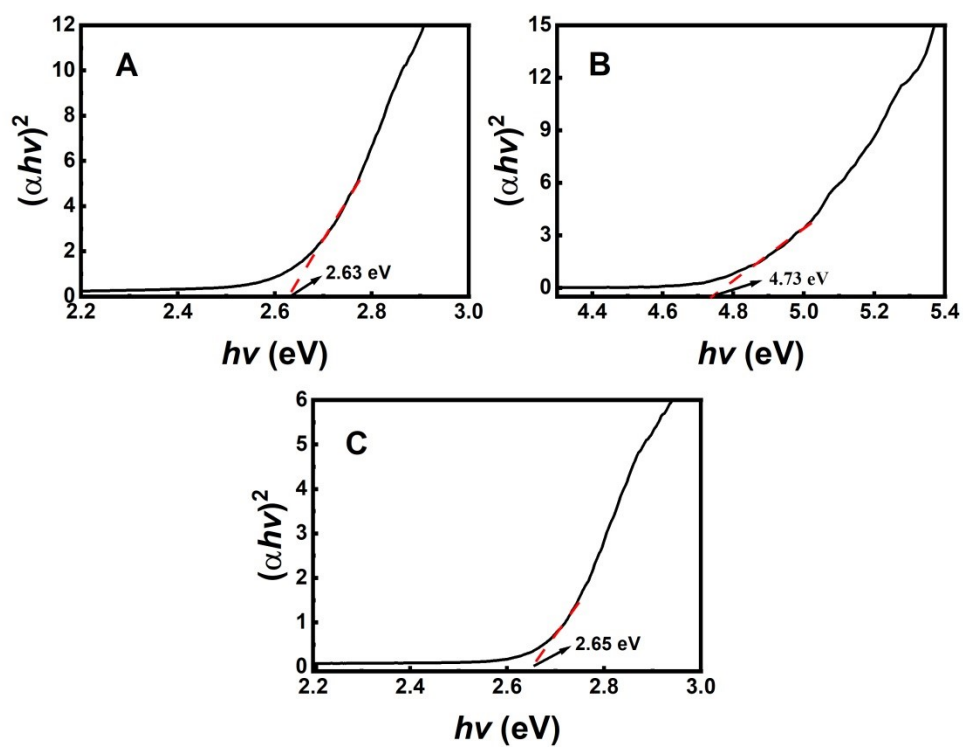

**Fig. S1.** Tauc plots of (A) the  $\text{Cd}_{0.5}\text{Zn}_{0.5}\text{S}$  nanoparticles, (B)  $\text{SrWO}_4$  and (C)  $\text{Cd}_{0.5}\text{Zn}_{0.5}\text{S}/\text{SrWO}_4$  (13%)-FP (1.7).

Supplementary Fig. S2

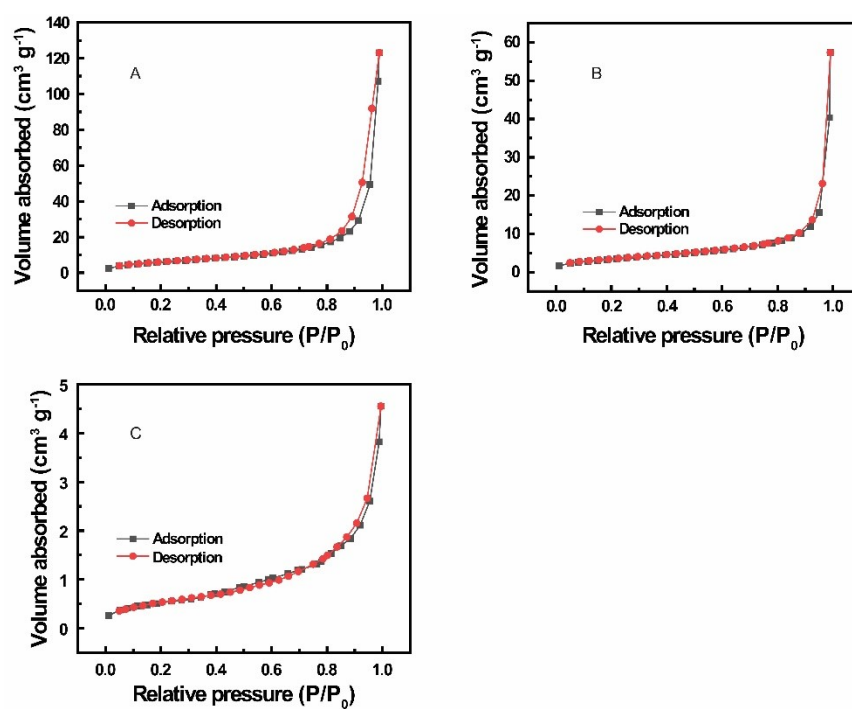

**Fig. S2.** N<sub>2</sub> adsorption-desorption isotherms of (A) the Cd<sub>0.5</sub>Zn<sub>0.5</sub>S nanoparticles, (B) Cd<sub>0.5</sub>Zn<sub>0.5</sub>S/SrWO<sub>4</sub> (13%) and (C) Cd<sub>0.5</sub>Zn<sub>0.5</sub>S/SrWO<sub>4</sub> (13%)-FP (1.7).

Supplementary Fig. S3

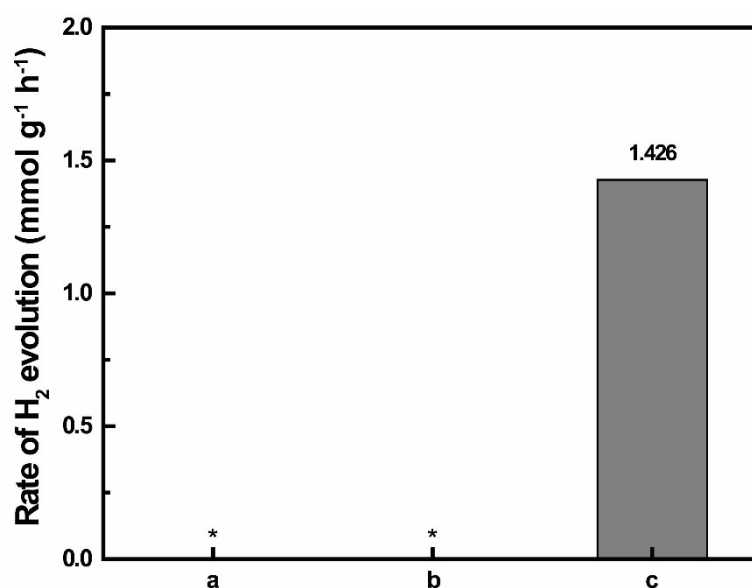

**Fig. S3.** (a) Rate of H<sub>2</sub> evolution from the lactic acid solution under visible irradiation when photocatalyst is absent (lactic acid aqueous solution 60 mL 17 vol.%, pH = 1.6, temperature 10°C, irradiation time 4 h); (b) rate of H<sub>2</sub> evolution over FP under visible irradiation (lactic acid aqueous solution 60 mL 17 vol.%, pH = 1.6, temperature 10°C, irradiation time 4 h); (c) rate of H<sub>2</sub> evolution over Cd<sub>0.5</sub>Zn<sub>0.5</sub>S/SrWO<sub>4</sub> (13%) under visible irradiation (photocatalyst 1 mg, lactic acid aqueous solution 60 mL 17 vol.%, pH = 1.6, temperature 10°C, irradiation time 4 h).

Supplementary Fig. S4

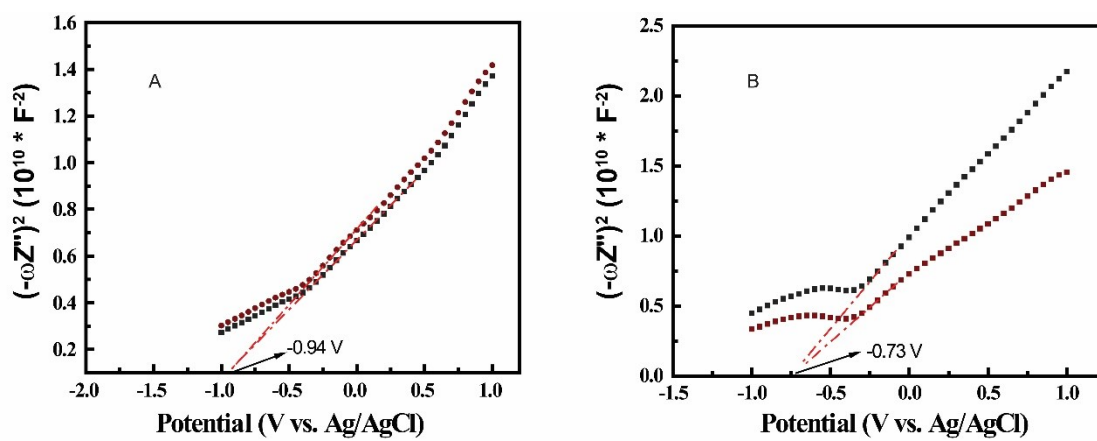

**Fig. S4.** Mott-Schottky curves of (A) the  $\text{Cd}_{0.5}\text{Zn}_{0.5}\text{S}$  nanoparticles and (B) the  $\text{SrWO}_4$  nanoparticles.

Supplementary Fig. S5

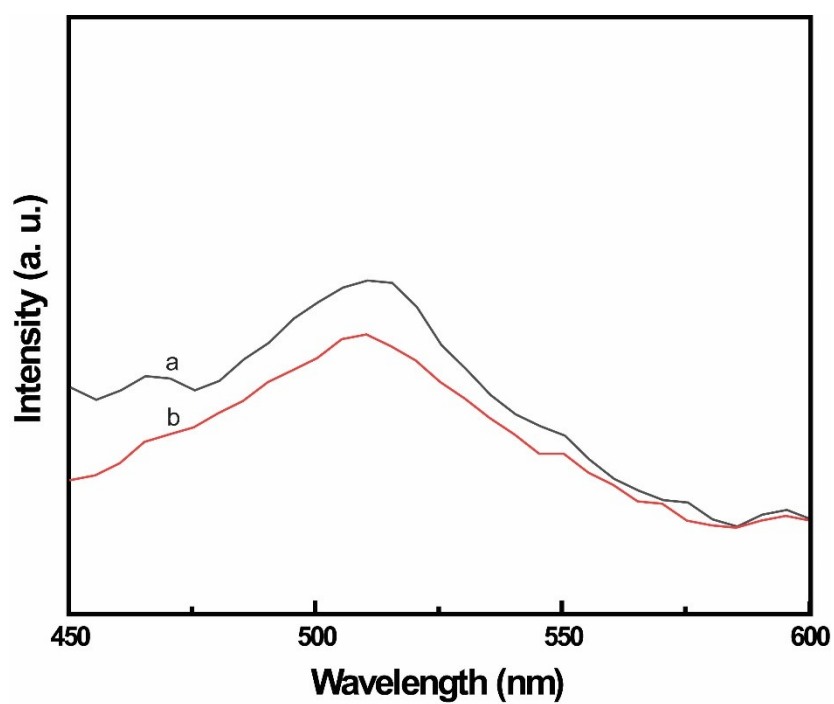

**Fig. S5.** Fluorescence spectra of (a) the  $\text{Cd}_{0.5}\text{Zn}_{0.5}\text{S}$  nanoparticles and (b)  $\text{Cd}_{0.5}\text{Zn}_{0.5}\text{S}/\text{SrWO}_4$  (13%) (excitation wavelength 400 nm).

Supplementary Fig. S6

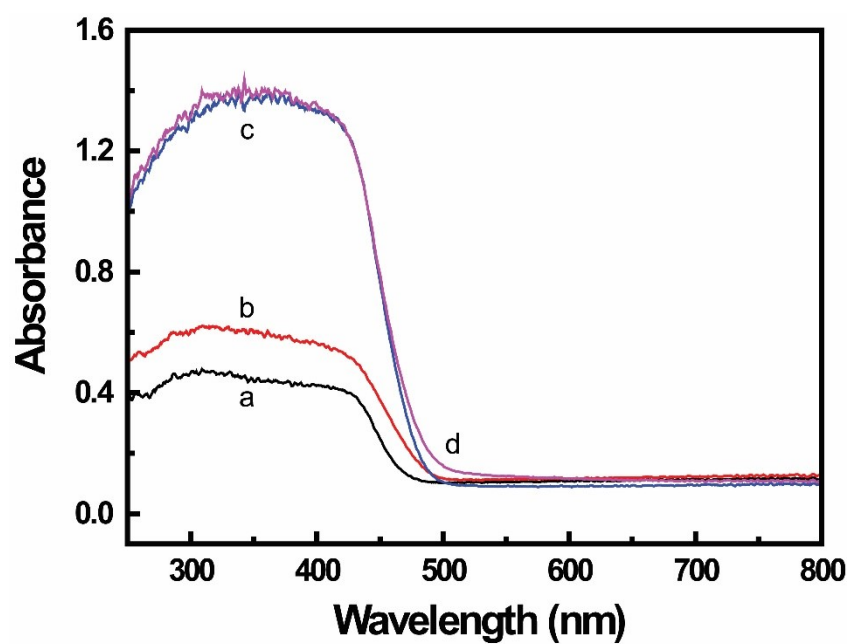

**Fig. S6.** UV-vis reflective spectra of (a) Cd<sub>0.5</sub>Zn<sub>0.5</sub>S/SrWO<sub>4</sub> (13%)-FP (0.5), (b) Cd<sub>0.5</sub>Zn<sub>0.5</sub>S/SrWO<sub>4</sub> (13%)-FP (1.7), (c) Cd<sub>0.5</sub>Zn<sub>0.5</sub>S/SrWO<sub>4</sub> (13%)-FP (17.6) and (d) Cd<sub>0.5</sub>Zn<sub>0.5</sub>S/SrWO<sub>4</sub> (13%)-FP (52.1).

Supplementary Fig. S7

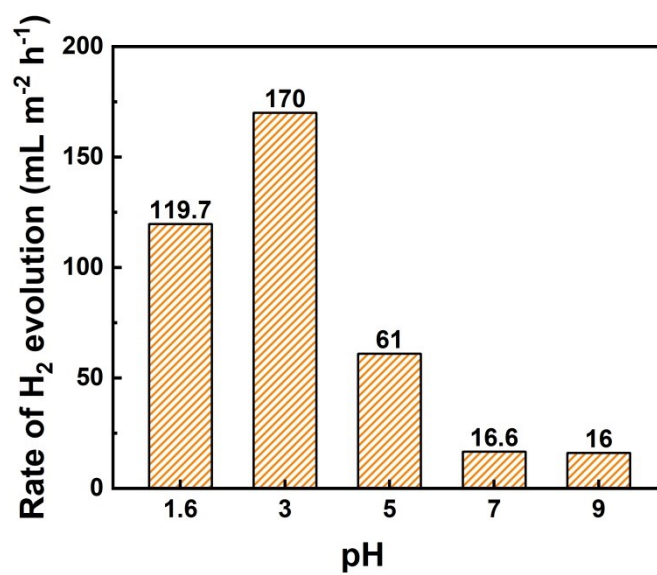

**Fig. S7.** Effect of pH on the photocatalytic activity of Cd<sub>0.5</sub>Zn<sub>0.5</sub>S/SrWO<sub>4</sub> (13%)-FP

(1.7).



Supplementary Table S1

**Table S1.** Photocatalytic H<sub>2</sub> evolution rate over Cd<sub>0.5</sub>Zn<sub>0.5</sub>S/SrWO<sub>4</sub> (13%)-FP (1.7) attached to various supports

| <b>Support</b> | <b>Rate of H<sub>2</sub> evolution (mL m<sup>-2</sup> h<sup>-1</sup>)</b> |
|----------------|---------------------------------------------------------------------------|
| Cu plate       | 0                                                                         |
| Ti plate       | 54.6                                                                      |
| Mica plate     | 73.8                                                                      |
| Al plate       | 86                                                                        |
| Glass slice    | 170                                                                       |

Supplementary Fig. S8

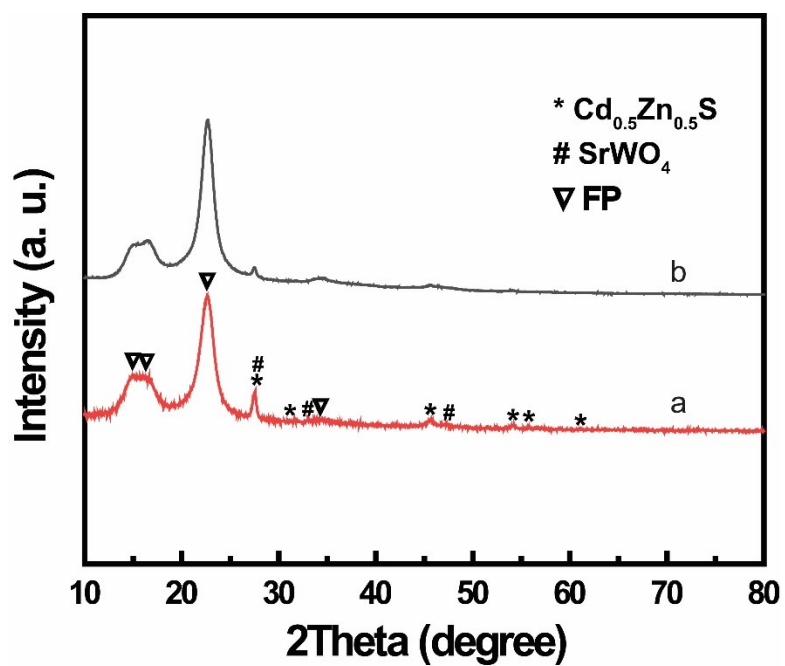

**Fig. S8.** XRD patterns of (a) fresh  $\text{Cd}_{0.5}\text{Zn}_{0.5}\text{S}/\text{SrWO}_4$  (13%)-FP (1.7) and (b)  $\text{Cd}_{0.5}\text{Zn}_{0.5}\text{S}/\text{SrWO}_4$  (13%)-FP (1.7) used in strong acidic environment.

Supplementary Fig. S9

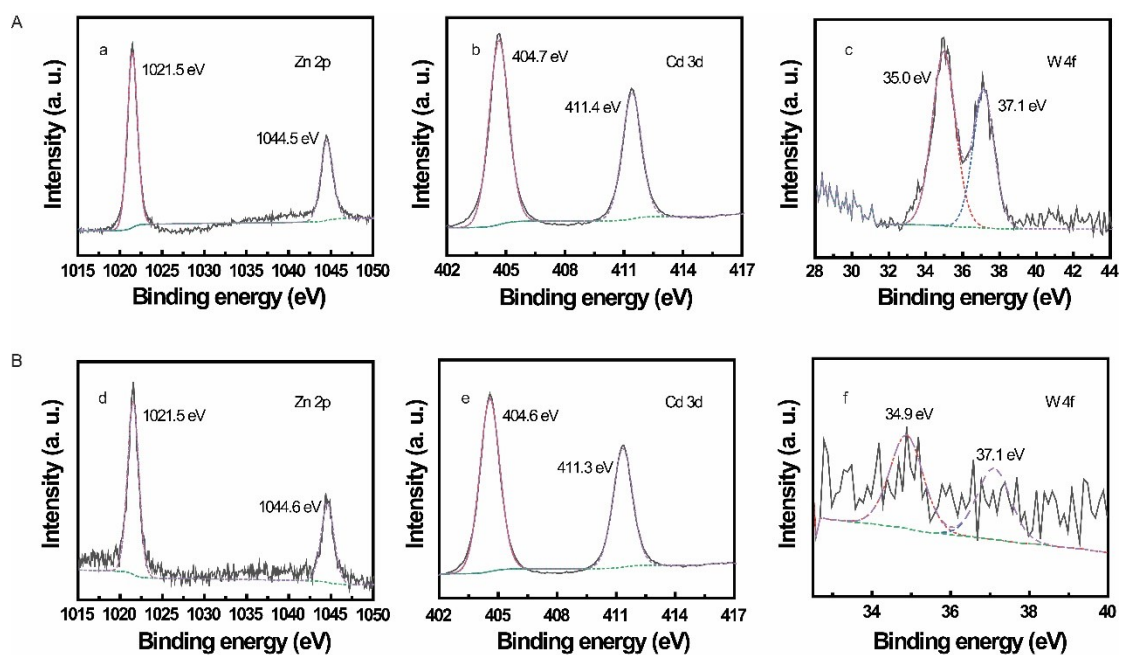

**Fig. S9.** XPS spectrum of (A) fresh  $\text{Cd}_{0.5}\text{Zn}_{0.5}\text{S}/\text{SrWO}_4$  (13%)-FP (1.7) and (B)  $\text{Cd}_{0.5}\text{Zn}_{0.5}\text{S}/\text{SrWO}_4$  (13%)-FP (1.7) used in strong acidic environment: (a) Zn 2p, (b) Cd 3d, (c) W 4f, (d) Zn 2p, (e) Cd 3d and (f) W 4f high resolution XPS spectra (solid lines) and curve-fitting analysis (dot lines) of states of Zn, Cd and W.

Supplementary Fig. S10

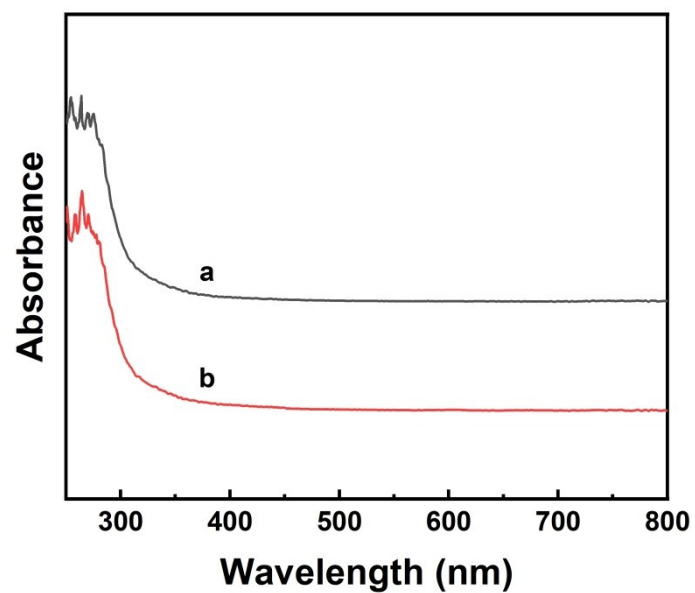

**Fig. S10.** UV-vis spectra of lactic acid solution: (a) before stirring, (b) after stirring at  $600 \text{ r min}^{-1}$  for 4 h in the presence of  $\text{Cd}_{0.5}\text{Zn}_{0.5}\text{S}/\text{SrWO}_4$  (13%)-FP (1.7).

Supplementary Fig. S11

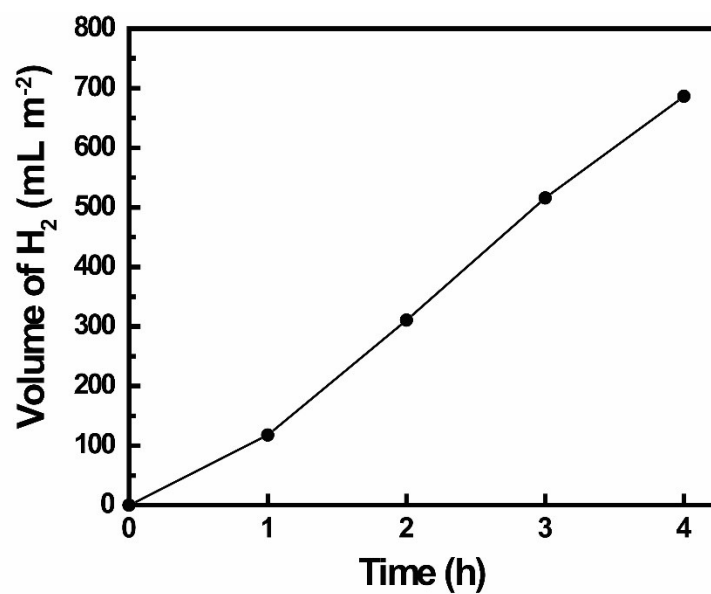

**Fig. S11.** Time-course of photocatalytic H<sub>2</sub> evolution over Cd<sub>0.5</sub>Zn<sub>0.5</sub>S/SrWO<sub>4</sub> (13%)-FP (1.7) which is folded four times (lactic acid aqueous solution 60 mL, 17 vol.%, pH = 3, temperature 10°C).

Supplementary Fig. S12

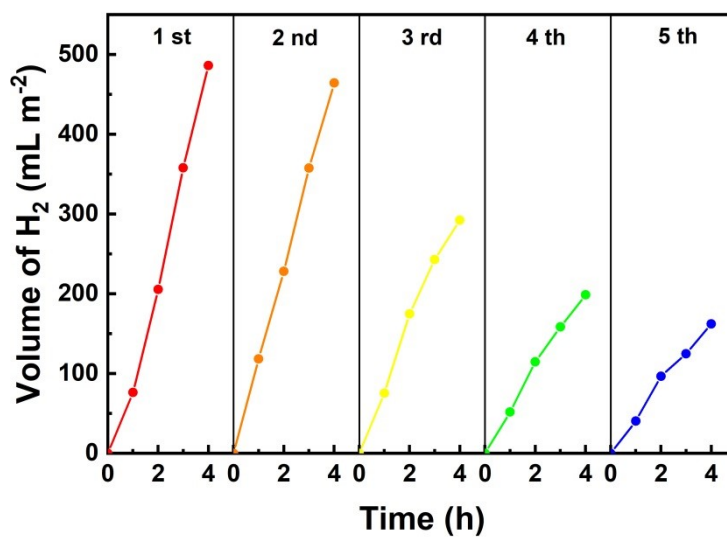

**Fig. S12.** Durability of Cd<sub>0.5</sub>Zn<sub>0.5</sub>S/SrWO<sub>4</sub> (13%)-FP (1.7) (lactic acid aqueous solution 60 mL 17 vol.%, pH = 3, temperature 10°C, irradiation time 4 h).

Supplementary Fig. S13

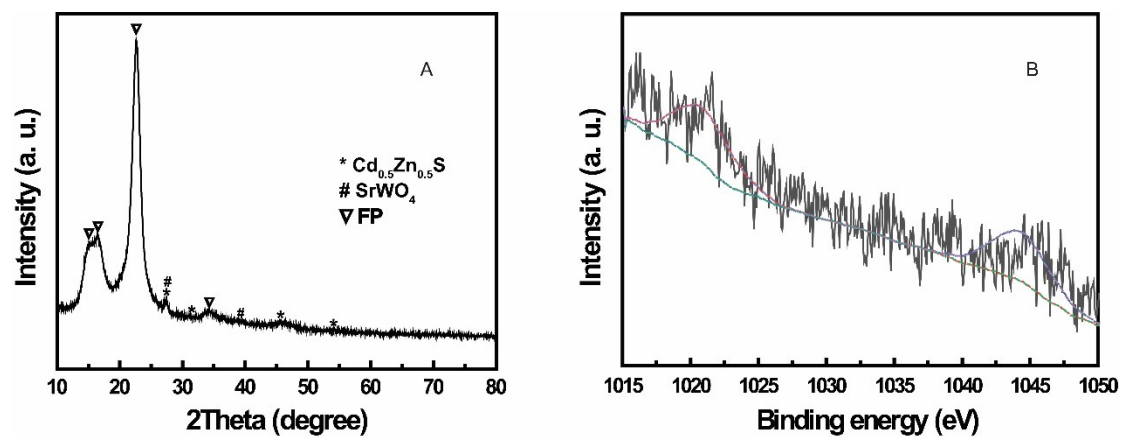

**Fig. S13.** (A) XRD pattern of the used Cd<sub>0.5</sub>Zn<sub>0.5</sub>S/SrWO<sub>4</sub> (13%)-FP (1.7) and (B) Zn 2p high resolution XPS spectrum (solid line) of the used Cd<sub>0.5</sub>Zn<sub>0.5</sub>S/SrWO<sub>4</sub> (13%)-FP (1.7) and curve-fitting analysis (dot lines) of states of Zn.
